# Supplementary material
Source: PubMed Central journal article supplement (PMC7269358)
Supplement: ASN.2019101029SupplementaryData.pdf [file ASN.2019101029SupplementaryData.pdf]

## SUPPLEMENTARY MATERIALS

| <b>Supplemental Table of Contents</b> |                                                                                          |
|---------------------------------------|------------------------------------------------------------------------------------------|
| <b>Figure S1</b>                      | Rarefaction Curve.                                                                       |
| <b>Figure S2</b>                      | HF Diet attenuates the clinical and histological manifestations of Diabetic Nephropathy. |
| <b>Figure S3</b>                      | Changes to gut microbiota prior to and following STZ injection.                          |
| <b>Table S1</b>                       | Nutritional parameters of experimental diets.                                            |

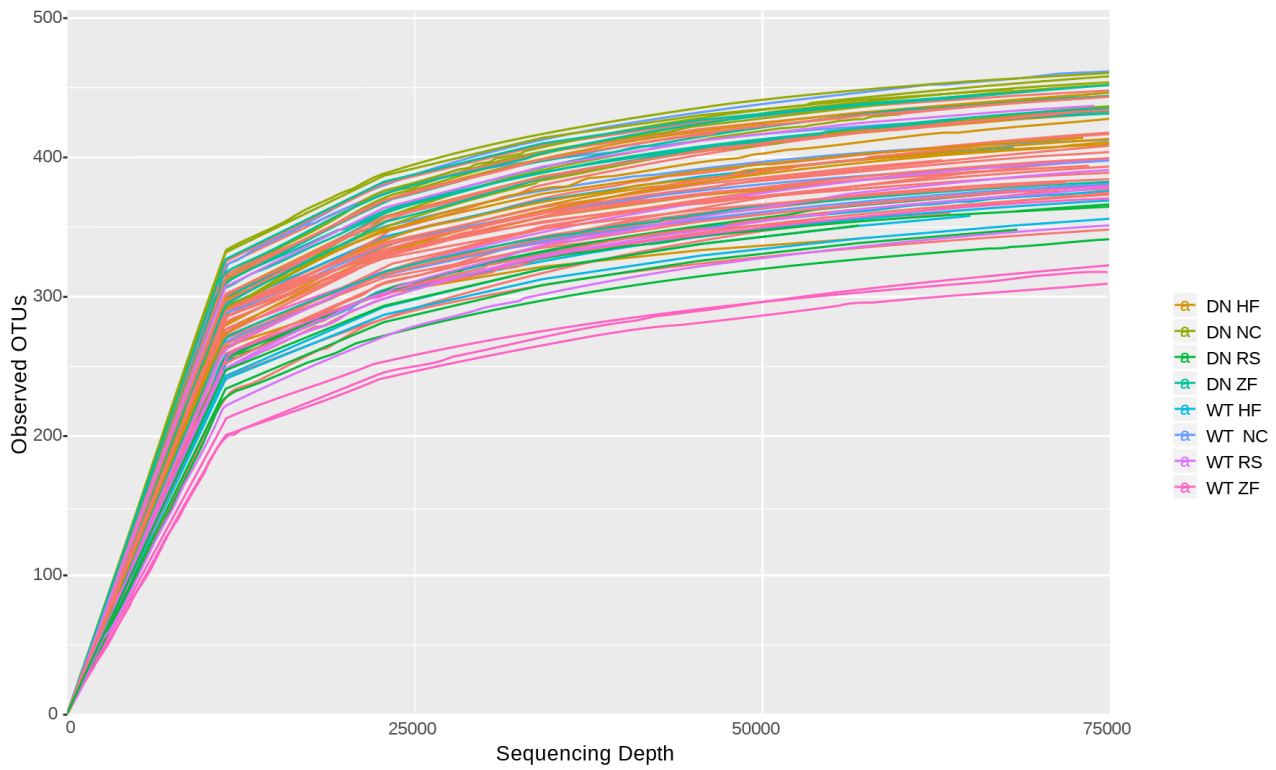

**Figure S1: Rarefaction Curve.**

The y axis shows observed species (operational taxonomic units, OTUs) and the x axis shows number of valid sequences per sample. Each curve in the graph represents an individual sample, grouped according to treatment (legend). All curves plateau indicating, indicating adequate sequencing depth.

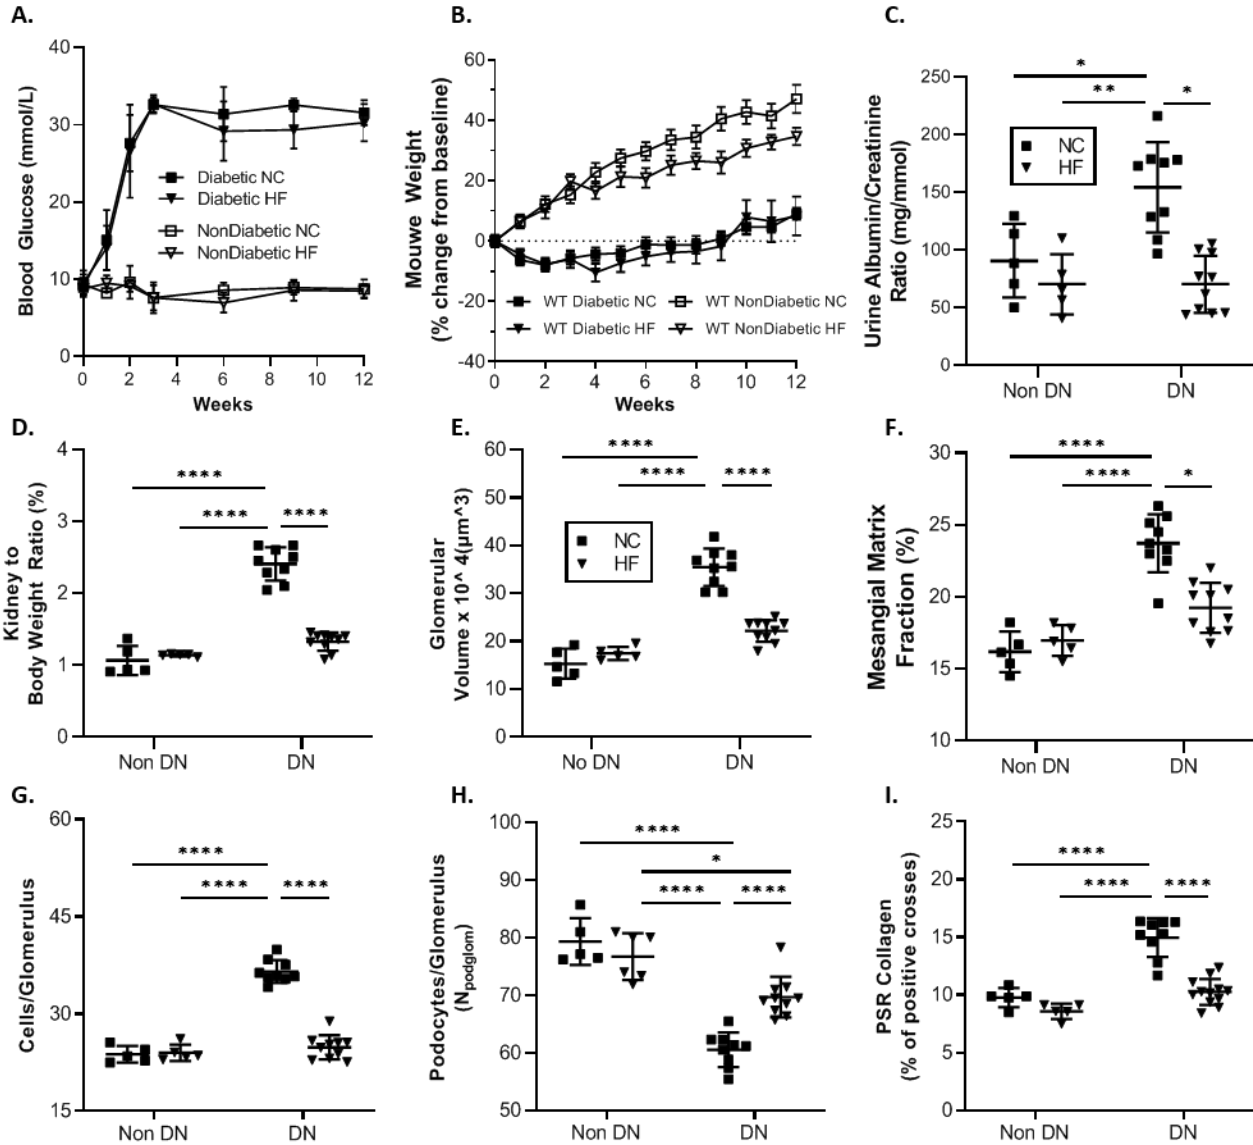

**Figure S2. HF Diet (SF11-029) attenuates the clinical and histological manifestations of Diabetic Nephropathy.**

High fiber fed mice displayed a similar progression of blood glucose (A) and body weight (B) profiles compared to NC fed controls over a period of 12 weeks. HF fed diabetic mice were protected from development of albuminuria, with no significant difference compared to non-diabetic controls at 12 weeks (C). Diabetic glomerular and interstitial changes including kidney to body weight ratio (D), glomerular volume and cellularity (E, G), mesangial expansion (F), podocyte density (H) and interstitial

fibrosis (I) are diminished with HF diet vs NC fed mice. Data are shown as means  $\pm$  SD; \*\*\*\*  $p < 0.0001$ ,

\*\*  $P < 0.01$ , \* $P < 0.05$ .

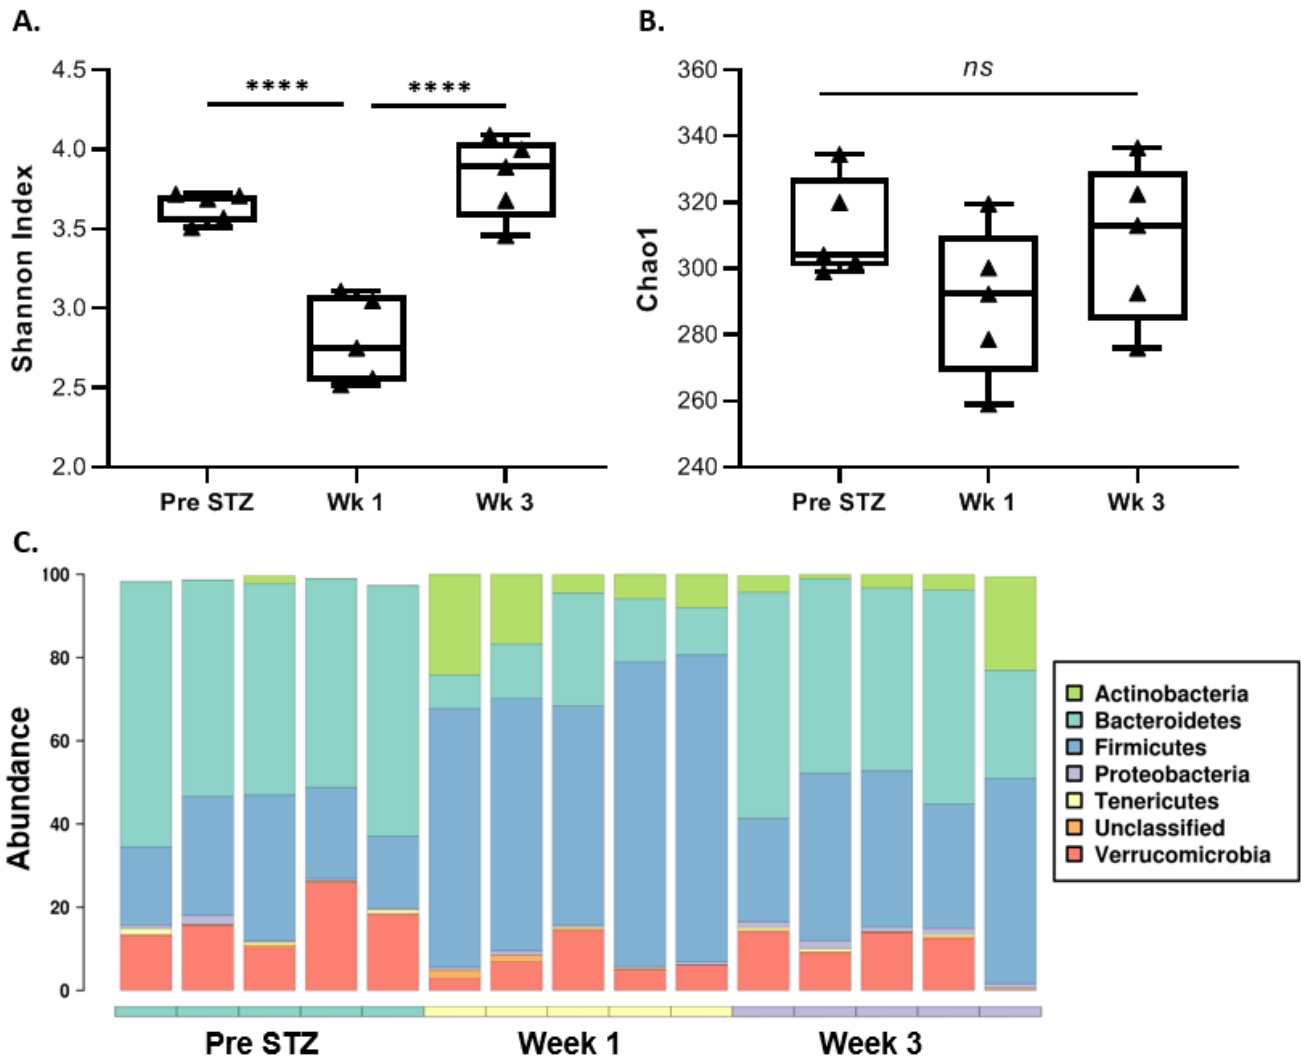

**Figure S3. Changes to gut microbiota prior to and following STZ injection.** Species richness estimate (Chao1) and diversity index (Shannon) on NC at three time points, prior to and following STZ injection (A, B) demonstrating a significant drop in diversity and a trend to reduced evenness at week 1 which recovers by week 3. (C) Relative abundance of bacteria presented at the phylum level (legend) prior to, and following STZ injection. Data are shown as means  $\pm$  SD; \*\*\*\*  $P < 0.0001$ .

| Nutritional Parameter                | Control (AING93G) | Resistant Starch (SF11-025) | High Fiber (SF11-029) | Zero Fiber (SF09-028) |
|--------------------------------------|-------------------|-----------------------------|-----------------------|-----------------------|
| Crude Fiber                          | 4.7%              | 4.7%                        | 35%                   | 0%                    |
| AD Fiber                             | 4.7%              | 4.7%                        | 35%                   | 0%                    |
| Starch                               | 53.6%             | 63.6%                       | 40.2%                 | 0%                    |
|                                      | (wheat)           | (all resistant)             | (wheat)               |                       |
| Total Protein                        | 19.4%             | 19.4%                       | 13.2%                 | 19.4%                 |
| Total Fat                            | 7%                | 7%                          | 4.5%                  | 7%                    |
| Digestible Energy                    | 16.1MJ/kg         | 16.3MJ/kg                   | 11MJ/kg               | 16.9MJ/kg             |
| <b>Total Digestible Energy From:</b> |                   |                             |                       |                       |
| Lipids                               | 16%               | 16%                         | 15%                   | 16%                   |
| Protein                              | 21%               | 21%                         | 19.7%                 | 21%                   |
| Carbohydrate                         | 56.8%             | 62%                         | 58.7%                 | -                     |

^AD, acid detergent

**Table S1. Nutritional parameters of experimental diets.**
